# Supplementary material
Source: HighWire-hosted journal article supplement (https://jcp.bmj.com/content/71/10/900)
Supplement: inline-supplementary-material-1 [file inline-supplementary-material-1.pdf]

**Supplementary Table 1.** Assessment scores for each laboratory for the testing

|        | Case 1   |    |    |     |           | Interpretat<br>A2 |
|--------|----------|----|----|-----|-----------|-------------------|
|        | Genotype |    |    |     | Deduction |                   |
|        | A1       | B1 | C1 | D1  |           |                   |
| Lab 1  | 0        | 1  | 0  | 0.2 | 1.2       | 0                 |
| Lab 2  | 0        | 1  | 0  | 0.2 | 1.2       | 0                 |
| Lab 3  | 0        | 1  | 0  | 0.2 | 1.2       | 0                 |
| Lab 4  | 0        | 1  | 0  | 0.2 | 1.2       | 0                 |
| Lab 5  | 0        | 1  | 0  | 0.2 | 1.2       | 0                 |
| Lab 6  | 0        | 1  | 0  | 0.2 | 1.2       | 0                 |
| Lab 7  | 2        | 0  | 0  | 0   | 2         | 0                 |
| Lab 8  | 0        | 1  | 0  | 0.2 | 1.2       | 0                 |
| Lab 9  | 0        | 1  | 0  | 0.2 | 1.2       | 0                 |
| Lab 10 | 0        | 0  | 0  | 0   | 0         | 0                 |

| Points deduction | Legend | Comments                                                |
|------------------|--------|---------------------------------------------------------|
| 2                | A1     | Critical genotyping error                               |
| 1                | B1     | Complete HLA allele sequence not determined             |
| 0.2              | C1     | Zygoty status not reported                              |
| 0.2              | D1     | Correct HLA nomenclature not used                       |
| 2                | A2     | Critical interpretation error                           |
| 1.5              | B2     | No clinical interpretation provided                     |
| 1                | C2     | No comment on negative result to exclude CD             |
| 0.5              | D2     | No comment on HLA typing used in isolation              |
| 0.5              | E2     | No comment on identified genotype and CD susceptibility |
| 0.2              | F2     | No references provided                                  |
| 1.5              | A3     | No statement about assay used provided                  |
| 0.5              | B3     | Limitations/sensitivity of assay used not provided      |

of five CD cases.

| tion |     |    |     |     |     |           | Methodology |     |           |     |
|------|-----|----|-----|-----|-----|-----------|-------------|-----|-----------|-----|
|      | B2  | C2 | D2  | E2  | F2  | Deduction | A3          | B3  | Deduction |     |
|      | 0   | 0  | 0   | 0   | 0   | 0.2       | 0.2         | 0   | 0.5       | 0.5 |
|      | 0   | 0  | 0.5 | 0.5 | 0.5 | 0.2       | 1.2         | 1.5 | 0         | 1.5 |
|      | 1.5 | 0  | 0   | 0   | 0   | 0         | 1.5         | 0   | 0.5       | 0.5 |
|      | 0   | 1  | 0.5 | 0.5 | 0   | 0         | 2           | 0   | 0.5       | 0.5 |
|      | 1.5 | 0  | 0   | 0   | 0   | 0         | 1.5         | 1.5 | 0         | 1.5 |
|      | 1.5 | 0  | 0   | 0   | 0   | 0         | 1.5         | 0   | 0.5       | 0.5 |
|      | 1.5 | 0  | 0   | 0   | 0   | 0         | 1.5         | 0   | 0.5       | 0.5 |
|      | 1.5 | 0  | 0   | 0   | 0   | 0         | 1.5         | 0   | 0.5       | 0.5 |
|      | 0   | 0  | 0.5 | 0.5 | 0.5 | 0.2       | 1.2         | 0   | 0.5       | 0.5 |
|      | 0   | 0  | 0   | 0   | 0   | 0.2       | 0.2         | 0   | 0.5       | 0.5 |



| E2  | F2  | Deduction | Methodology |    |           | Case 3 |    |          | C1  |
|-----|-----|-----------|-------------|----|-----------|--------|----|----------|-----|
|     |     |           | A3          | B3 | Deduction | A1     | B1 | Genotype |     |
| 0   | 0.2 | 0.2       | 0           | 0  | 0.5       | 0.5    | 0  | 1        | 0.2 |
| 0.5 | 0.2 | 1.2       | 1.5         | 0  | 0         | 1.5    | 0  | 1        | 0.2 |
| 0   | 0   | 1.5       | 0           | 0  | 0.5       | 0.5    | 0  | 1        | 0.2 |
| 0.5 | 0.2 | 1.2       | 0           | 0  | 0.5       | 0.5    | 0  | 1        | 0.2 |
| 0   | 0   | 1.5       | 1.5         | 0  | 0         | 1.5    | 0  | 1        | 0.2 |
| 0   | 0   | 0.5       | 0           | 0  | 0.5       | 0.5    | 0  | 1        | 0.2 |
| 0   | 0   | 1.5       | 0           | 0  | 0.5       | 0.5    | 0  | 1        | 0.2 |
| 0   | 0   | 1.5       | 0           | 0  | 0.5       | 0.5    | 0  | 1        | 0.2 |
| 0   | 0.2 | 0.7       | 0           | 0  | 0.5       | 0.5    | 0  | 1        | 0   |
| 0   | 0.2 | 0.2       | 0           | 0  | 0.5       | 0.5    | 0  | 0        | 0   |

| D1  | Deduction |  | Interpretation |     |    |    |     | Deduction |     |     |
|-----|-----------|--|----------------|-----|----|----|-----|-----------|-----|-----|
|     |           |  | A2             | B2  | C2 | D2 | E2  | F2        |     |     |
| 0.2 | 1.4       |  | 0              | 0   | 0  | 0  | 0   | 0         | 0.2 | 0.2 |
| 0.2 | 1.4       |  | 0              | 0   | 0  | 0  | 0.5 | 0.5       | 0.2 | 1.2 |
| 0.2 | 1.4       |  | 0              | 1.5 | 0  | 0  | 0   | 0         | 0   | 1.5 |
| 0.2 | 1.4       |  | 0              | 0   | 0  | 0  | 0.5 | 0.5       | 0.2 | 1.2 |
| 0.2 | 1.4       |  | 0              | 1.5 | 0  | 0  | 0   | 0         | 0   | 1.5 |
| 0.2 | 1.4       |  | 0              | 0   | 0  | 0  | 0.5 | 0.5       | 0   | 1   |
| 0.2 | 1.4       |  | 0              | 1.5 | 0  | 0  | 0   | 0         | 0   | 1.5 |
| 0.2 | 1.4       |  | 0              | 1.5 | 0  | 0  | 0   | 0         | 0   | 1.5 |
| 0.2 | 1.2       |  | 0              | 0   | 0  | 0  | 0.5 | 0         | 0.2 | 0.7 |
| 0   | 0         |  | 0              | 0   | 0  | 0  | 0   | 0         | 0.2 | 0.2 |

**Case 4**

| Methodology |     |           | Genotype |    |     |     |           |    | Interpretat |
|-------------|-----|-----------|----------|----|-----|-----|-----------|----|-------------|
| A3          | B3  | Deduction | A1       | B1 | C1  | D1  | Deduction | A2 |             |
| 0           | 0.5 | 0.5       | 0        | 1  | 0.2 | 0.2 | 1.4       | 0  |             |
| 1.5         | 0   | 1.5       | 0        | 1  | 0.2 | 0.2 | 1.4       | 0  |             |
| 0           | 0.5 | 0.5       | 0        | 0  | 0.2 | 0.2 | 0.4       | 0  |             |
| 0           | 0.5 | 0.5       | 0        | 1  | 0.2 | 0.2 | 1.4       | 0  |             |
| 1.5         | 0   | 1.5       | 0        | 1  | 0.2 | 0.2 | 1.4       | 0  |             |
| 0           | 0.5 | 0.5       | 0        | 1  | 0.2 | 0.2 | 1.4       | 0  |             |
| 0           | 0.5 | 0.5       | 0        | 1  | 0.2 | 0.2 | 1.4       | 0  |             |
| 0           | 0.5 | 0.5       | 0        | 1  | 0.2 | 0.2 | 1.4       | 0  |             |
| 0           | 0.5 | 0.5       | 0        | 1  | 0   | 0.2 | 1.2       | 0  |             |
| 0           | 0.5 | 0.5       | 0        | 0  | 0   | 0   | 0         | 0  |             |

| tion |     |    |     |     |           |     | Methodology |     |           |
|------|-----|----|-----|-----|-----------|-----|-------------|-----|-----------|
| B2   | C2  | D2 | E2  | F2  | Deduction |     | A3          | B3  | Deduction |
|      | 0   | 0  | 0   | 0   | 0.2       | 0.2 | 0           | 0.5 | 0.5       |
|      | 0   | 0  | 0.5 | 0.5 | 0.2       | 1.2 | 1.5         | 0   | 1.5       |
|      | 1.5 | 0  | 0   | 0   | 0         | 1.5 | 0           | 0.5 | 0.5       |
|      | 0   | 0  | 0.5 | 0.5 | 0.2       | 1.2 | 0           | 0.5 | 0.5       |
|      | 1.5 | 0  | 0   | 0   | 0         | 1.5 | 1.5         | 0   | 1.5       |
|      | 1.5 | 0  | 0   | 0   | 0         | 1.5 | 0           | 0.5 | 0.5       |
|      | 1.5 | 0  | 0   | 0   | 0         | 1.5 | 0           | 0.5 | 0.5       |
|      | 1.5 | 0  | 0   | 0   | 0         | 1.5 | 0           | 0.5 | 0.5       |
|      | 0   | 0  | 0.5 | 0   | 0.2       | 0.7 | 0           | 0.5 | 0.5       |
|      | 0   | 0  | 0   | 0   | 0.2       | 0.2 | 0           | 0.5 | 0.5       |





| E2  | F2  | Deduction | Methodology |     | Deduction |
|-----|-----|-----------|-------------|-----|-----------|
|     |     |           | A3          | B3  |           |
| 0   | 0.2 | 0.2       | 0           | 0.5 | 0.5       |
| 0.5 | 0.2 | 1.2       | 1.5         | 0   | 1.5       |
| 0   | 0   | 1.5       | 0           | 0.5 | 0.5       |
| 0.5 | 0.2 | 1.2       | 0           | 0.5 | 0.5       |
| 0   | 0   | 1.5       | 1.5         | 0   | 1.5       |
| 0   | 0   | 0.5       | 0           | 0.5 | 0.5       |
| 0   | 0   | 1.5       | 0           | 0.5 | 0.5       |
| 0   | 0   | 1.5       | 0           | 0.5 | 0.5       |
| 0   | 0.2 | 0.7       | 0           | 0.5 | 0.5       |
| 0   | 0.2 | 0.2       | 0           | 0.5 | 0.5       |
